# Supplementary material for: Mitonuclear Genetic Interactions in the Basidiomycete Heterobasidion parviporum Involve a Non-conserved Mitochondrial Open Reading Frame
Source: Front Fungal Biol. 2021 Dec 14;2:779337. doi: 10.3389/ffunb.2021.779337 (PMC10512249; doi:10.3389/ffunb.2021.779337)
Supplement: Supplementary file 1 [file Table_1.XLSX]

## Sheet: Labels
Original names: Names under which parental homokaryotic isolates have been published (Clergeot et al. 2019)
Labeling code: numeric code used to label isolates in this study
SNP calling order: isolates order in the output vcf files resulting from SNP calling (Clergeot et al. 2019)
Reference isolate (ref): Sä_159-5 (Ho18) is the reference isolate for SNP calling and map-based genome sequence assemblies (Clergeot et al. 2019)
Original name	Labeling code	SNP calling order
87074_1	19	1
87075_2	20	2
87_124_2	1	3
87_179_2	2	4
87_183_3	3	5
87_215_3	4	6
90137_1	21	7
90166_2	22	8
91132_1	23	9
93028_1	24	10
93134_1	25	11
95123	5	12
95126a	6	13
95156	7	14
95191	9	15
Br244_4	31	16
Br518_c2	10	17
Fas16_1	26	18
FSE_3	27	19
FSE_7	11	20
HR32	30	21
OH2_2	12	22
OH2_3c5	35	23
Rb31_3	13	24
RB48B2	34	25
RB48_9	14	26
RB89c6	33	27
RB94_11	15	28
Sa94_B_8	32	29
Sa_159-5 (ref)	18	30

## Sheet: Crossing chart
Homokaryon crossing chart (after Clergeot et al. 2019)
Acc	Acceptor isolate
Don	Donor isolate
X	Crossing failure
18(5)*	Unpaired heterokaryotic isolate
								Don
		2	5	9	11	18	19	20	24	26	27	30	31	32
	2		2(5)	2(9)	2(11)	2(18)	2(19)	2(20)	2(24)	2(26)	2(27)	2(30)	2(31)	2(32)
	5	5(2)		5(9)	5(11)	X	5(19)	5(20)	5(24)	5(26)	5(27)	5(30)	5(31)	5(32)
	9	9(2)	9(5)		9(11)	9(18)	9(19)	9(20)	X	9(26)	9(27)*	9(30)	9(31)	9(32)
	11	11(2)	11(5)	11(9)		11(18)	11(19)	11(20)	11(24)	11(26)	X	11(30)	11(31)	11(32)
	18	18(2)	18(5)*	18(9)	18(11)		18(19)	18(20)	18(24)	18(26)	X	18(30)	18(31)	18(32)
	19	19(2)	19(5)	19(9)	19(11)	19(18)		19(20)	19(24)	19(26)	19(27)	19(30)	19(31)	19(32)
Acc	20	20(2)	20(5)	20(9)	20(11)	20(18)	20(19)		20(24)	20(26)	20(27)	20(30)	20(31)	20(32)
	24	24(2)	24(5)	24(9)*	24(11)	24(18)	24(19)	24(20)		24(26)	24(27)	24(30)	24(31)	24(32)
	26	26(2)	26(5)	26(9)	26(11)	26(18)	26(19)	26(20)	26(24)		26(27)	26(30)	26(31)	26(32)
	27	27(2)	27(5)	X	X	27(18)*	27(19)	27(20)	27(24)	27(26)		27(30)	27(31)	27(32)
	30	30(2)	30(5)	30(9)	30(11)	30(18)	30(19)	30(20)	30(24)	30(26)	30(27)		30(31)	30(32)
	31	31(2)	31(5)	31(9)	31(11)	31(18)	31(19)	31(20)	31(24)	31(26)	31(27)	31(30)		31(32)
	32	32(2)	32(5)	32(9)	32(11)	32(18)	32(19)	32(20)	32(24)	32(26)	32(27)	32(30)	32(31)
