# Supplementary material for: Mitonuclear Genetic Interactions in the Basidiomycete Heterobasidion parviporum Involve a Non-conserved Mitochondrial Open Reading Frame
Source: Front Fungal Biol. 2021 Dec 14;2:779337. doi: 10.3389/ffunb.2021.779337 (PMC10512249; doi:10.3389/ffunb.2021.779337)
Supplement: Supplementary file 3 [file Table_3.XLSX]

## Sheet: MW tests - all data
Results of Mann-Whitney Tests for Two Independent Samples (two tails) - All heterokaryons growth rate assays
For each heterokaryon, all data were used for the test. The initial level of risk a = 0,05 was adjusted for multiple testing (n=73) according to the method of Holm-Bonferroni.
Het Pair	Het1	Het2	n1	n2	Median1	Median2	IQR1	IQR2	Skewness1	Skewness2	U	r	p	a	Rank	sig
(24;32)	32(24)	24(32)	36	56	7.5	5.875	1.3125	1.5625	-0.637682	-0.328109	318.5	0.575398	3.40882e-08	0.000684932	1	S
(20;32)	32(20)	20(32)	32	20	6.25	7.75	1.5625	1	-0.0171954	0.399565	69.5	0.653789	2.42256e-06	0.000694444	2	S
(18;20)	20(18)	18(20)	12	32	7.375	4.625	0.5625	2.0625	-0.610398	0.357298	24	0.667824	9.43017e-06	0.000704225	3	S
(31;32)	32(31)	31(32)	20	24	7.75	6.75	0.75	0.75	-0.0306873	0.683422	62.5	0.632616	2.71308e-05	0.000714286	4	S
(9;20)	20(9)	9(20)	20	20	6.375	5.125	1	1.5	-0.337	-0.314667	47	0.657222	3.22963e-05	0.000724638	5	S
(2;11)	11(2)	2(11)	16	20	6	6.75	1.0625	0.5625	-0.812589	-0.65578	33.5	0.673897	5.26853e-05	0.000735294	6	S
(18;32)	32(18)	18(32)	32	44	6.5	5.5	1.875	2.75	-0.119592	-0.271517	328.5	0.453608	7.67062e-05	0.000746269	7	S
(30;32)	30(32)	32(30)	20	24	7.25	8	1	0.5	-0.113237	-0.412831	73.5	0.593917	8.16166e-05	0.000757576	8	S
(20;30)	30(20)	20(30)	20	32	7.25	6.125	0.625	2.125	-0.39507	-0.0862638	111.5	0.54542	8.38633e-05	0.000769231	9	S
(2;26)	26(2)	2(26)	24	20	5.375	7	3.25	0.75	-0.384569	-0.151216	76.5	0.582369	0.000112003	0.00078125	10	S
(9;32)	9(32)	32(9)	24	36	4	5.625	0.5625	2.9375	0.447689	-0.030968	195.5	0.46147	0.000350855	0.000793651	11	S
(9;18)	9(18)	18(9)	24	24	5.5	6	0.3125	0.8125	0.146103	0.401676	125.5	0.485931	0.00076093	0.000806452	12	S
(2;24)	24(2)	2(24)	20	24	6.625	6	0.5	1.6875	0.203394	-0.272255	98.5	0.503651	0.000835247	0.000819672	13	NS
(5;27)	5(27)	27(5)	36	24	6.625	7	0.5	0.75	-0.226689	0.0256906	211.5	0.430851	0.000845789	0.000833333	14	NS
(5;32)	5(32)	32(5)	20	20	8	7.625	0.75	0.75	0.281321	0.106864	86	0.490718	0.001912	0.000847458	15	NS
(11;19)	19(11)	11(19)	20	20	6.875	6.25	1	1.125	0.126271	-0.0853227	88	0.483027	0.0022511	0.000862069	16	NS
(11;32)	11(32)	32(11)	20	32	8	7.5	0.5625	0.8125	-0.383618	-0.00390783	162	0.412979	0.00290101	0.000877193	17	NS
(19;27)	27(19)	19(27)	28	28	5.75	6.75	1.3125	0.875	0.811707	-0.302302	230.5	0.354122	0.00804897	0.000892857	18	NS
(27;31)	31(27)	27(31)	24	32	7.5	7	0.5	2.3125	1.04427	-0.514498	226.5	0.349116	0.00898712	0.000909091	19	NS
(11;26)	26(11)	11(26)	28	28	7.5	7.125	0.5	1.5625	-0.375222	-0.332097	242.5	0.329092	0.0137895	0.000925926	20	NS
(5;11)	5(11)	11(5)	20	20	7.75	7.125	0.5625	1.75	0.505181	-0.360165	110	0.387004	0.0143799	0.000943396	21	NS
(19;31)	19(31)	31(19)	20	20	6.5	7	0.5625	1	0.487914	-0.0247353	110.5	0.385458	0.0147749	0.000961538	22	NS
(5;30)	5(30)	30(5)	20	20	7.25	7.5	0.25	0.5625	-0.463762	-0.258407	112.5	0.376773	0.0171759	0.000980392	23	NS
(5;19)	5(19)	19(5)	20	32	6.5	5.5	2	1.5	-0.0247786	0.620999	194	0.329571	0.0174744	0.001	24	NS
(26;27)	27(26)	26(27)	20	20	7.625	7.25	0.5	0.75	-0.0562915	0.422923	113.5	0.372131	0.0185945	0.00102041	25	NS
(11;31)	31(11)	11(31)	20	20	6.5	7.125	1.5	1.25	-0.24202	-0.433332	120.5	0.341159	0.0309528	0.00104167	26	NS
(11;30)	30(11)	11(30)	20	32	7	6.5	0.5625	1.625	-0.339363	-0.378862	207.5	0.294798	0.0335182	0.00106383	27	NS
(2;27)	27(2)	2(27)	28	20	6	6.25	1	0.5	-0.296663	-0.212876	182.5	0.295274	0.0407841	0.00108696	28	NS
(18;31)	31(18)	18(31)	20	20	7.5	7	0.125	1.25	-1.0027	-0.564396	127	0.322844	0.041167	0.00111111	29	NS
(18;19)	18(19)	19(18)	36	44	5.5	5	0.75	3.9375	-0.255792	-0.238755	583.5	0.22571	0.0435065	0.00113636	30	NS
(9;26)	26(9)	9(26)	20	20	6.75	6.5	1.125	1	0.542875	-0.039738	126.5	0.315695	0.0458656	0.00116279	31	NS
(2;18)	18(2)	2(18)	20	20	7	6.375	1	0.875	-0.860603	-0.597187	130	0.300875	0.0570534	0.00119048	32	NS
(9;31)	9(31)	31(9)	36	48	7	6.625	0.75	1.25	-0.052823	-0.73409	660	0.201497	0.0647829	0.00121951	33	NS
(2;19)	2(19)	19(2)	48	36	5.5	5.75	1.25	0.5625	-0.589608	-0.565009	660.5	0.201011	0.0654324	0.00125	34	NS
(11;18)	11(18)	18(11)	28	32	7	5.875	0.75	2.5625	-0.0719025	-0.598275	324.5	0.23667	0.0667675	0.00128205	35	NS
(27;30)	27(30)	30(27)	20	20	6.5	7	1.625	1.25	-0.140696	0.533057	133	0.287138	0.0693669	0.00131579	36	NS
(19;26)	19(26)	26(19)	32	32	7	6.875	0.75	0.75	0.974496	0.390417	383.5	0.217029	0.0825223	0.00135135	37	NS
(20;31)	31(20)	20(31)	28	40	7.5	7.25	0.8125	2.75	-0.27579	-0.494269	436	0.187773	0.121522	0.00138889	38	NS
(26;32)	32(26)	26(32)	20	20	8.5	8.125	0.3125	1.0625	0.17575	-0.0160427	144	0.241814	0.126174	0.00142857	39	NS
(20;24)	20(24)	24(20)	36	32	5.5	4.625	2.75	2.0625	0.0151489	0.701785	453	0.183478	0.13028	0.00147059	40	NS
(19;20)	19(20)	20(19)	28	20	6.5	6.75	4.5	1.75	-0.263486	-0.530866	209	0.214598	0.137073	0.00151515	41	NS
(5;24)	5(24)	24(5)	28	40	6.375	4.375	1	4.5	-0.383852	0.0245249	445.5	0.173149	0.153344	0.0015625	42	NS
(27;32)	32(27)	27(32)	20	20	7.5	7.125	0.5	1	-0.298695	0.571494	148	0.223285	0.157897	0.0016129	43	NS
(20;27)	20(27)	27(20)	20	20	6.5	6.75	1.3125	0.625	-0.53429	0.831748	149.5	0.216497	0.170923	0.00166667	44	NS
(19;30)	19(30)	30(19)	20	20	6	7.5	1.5	2	0.20481	-0.390719	151.5	0.209368	0.18545	0.00172414	45	NS
(24;31)	31(24)	24(31)	32	32	6.25	6	2.25	2.3125	-0.387995	-0.270923	428.5	0.140503	0.261001	0.00178571	46	NS
(20;26)	26(20)	20(26)	20	32	6.125	6	1.3125	2.125	0.305513	-0.103593	261	0.154006	0.266761	0.00185185	47	NS
(5;26)	5(26)	26(5)	20	20	8	8.25	0.5	0.5	0.450481	0.341898	161.5	0.167136	0.290483	0.00192308	48	NS
(11;20)	20(11)	11(20)	20	32	5	6.5	1.3125	3.9375	0.623711	-0.366463	264	0.146131	0.291989	0.002	49	NS
(5;20)	20(5)	5(20)	24	20	7.25	7.75	2.9375	0.5	-0.652164	0.487767	197	0.152983	0.310215	0.00208333	50	NS
(9;11)	11(9)	9(11)	20	20	7	7	1.8125	0.75	-0.404112	0.277252	163.5	0.157116	0.320375	0.00217391	51	NS
(2;32)	2(32)	32(2)	28	24	7.5	7.125	1.5	1.875	-0.382454	-0.721331	287.5	0.123629	0.37266	0.00227273	52	NS
(24;30)	30(24)	24(30)	32	19	4.625	5.5	2.3125	0.875	0.266815	-0.870081	261	0.117415	0.401744	0.00238095	53	NS
(2;9)	9(2)	2(9)	28	28	6.5	6.5	0.5625	0.5625	-0.443815	-0.505103	343	0.108292	0.41772	0.0025	54	NS
(2;5)	5(2)	2(5)	20	20	6.75	6.5	0.5	0.875	0.293374	-0.0647913	173	0.116145	0.462603	0.00263158	55	NS
(2;30)	2(30)	30(2)	20	20	7	7.125	0.5625	0.75	-0.995406	0.561798	173.5	0.11443	0.469239	0.00277778	56	NS
(11;24)	24(11)	11(24)	20	20	6.5	6.25	0.75	0.5	-0.167937	0.92656	176	0.10324	0.513789	0.00294118	57	NS
(24;26)	24(26)	26(24)	28	40	6.375	5.75	1	3.5625	0.334317	-0.198475	509.5	0.0763603	0.528902	0.003125	58	NS
(26;30)	26(30)	30(26)	20	19	7.25	7.25	0.8125	0.875	-1.1976	-0.389357	168.5	0.097311	0.543382	0.00333333	59	NS
(24;27)	27(24)	24(27)	20	16	6.5	6.25	1.0625	1.25	-0.221433	0.00692846	143.5	0.0877234	0.598652	0.00357143	60	NS
(19;32)	19(32)	32(19)	20	24	6.625	6.75	0.5	0.3125	0.900522	-1.27213	218	0.0785957	0.602127	0.00384615	61	NS
(19;24)	19(24)	24(19)	20	32	6	6.25	0.75	2	-0.486316	-0.457809	295	0.0652959	0.637744	0.00416667	62	NS
(9;30)	9(30)	30(9)	24	24	6.875	7	1.25	0.5625	-0.226206	0.288585	265.5	0.0672091	0.641474	0.00454545	63	NS
(5;9)	5(9)	9(5)	20	20	7	7.25	0.5	0.5	1.33198	0.409523	183.5	0.0711875	0.652545	0.005	64	NS
(18;26)	26(18)	18(26)	20	20	6.75	6.25	1.375	0.875	-0.495553	0.116078	184	0.0686318	0.664241	0.00555556	65	NS
(2;31)	31(2)	2(31)	20	24	6.5	6.375	0.375	1.3125	-0.321069	-0.312249	223	0.0605478	0.687957	0.00625	66	NS
(18;30)	30(18)	18(30)	36	24	5.25	5.75	2.3125	0.875	0.205953	-0.37154	411	0.0409739	0.750953	0.00714286	67	NS
(2;20)	20(2)	2(20)	20	20	6.625	6.5	0.5625	0.25	1.11707	-0.437708	190	0.043111	0.785116	0.00833333	68	NS
(30;31)	31(30)	30(31)	28	28	7.5	7.5	0.75	0.5625	-0.0785242	-1.33144	376.5	0.0341571	0.798253	0.01	69	NS
(18;24)	18(24)	24(18)	20	20	2.25	2.5	0.625	1.3125	0.696647	0.834898	194	0.0257771	0.870496	0.0125	70	NS
(9;19)	9(19)	19(9)	20	20	7	7	0.75	0.75	-0.0131716	-0.460501	195.5	0.0193118	0.902789	0.0166667	71	NS
(5;31)	5(31)	31(5)	20	20	7.875	7.75	1.3125	0.5625	-0.098744	0.976107	198	0.00859969	0.956625	0.025	72	NS
(26;31)	31(26)	26(31)	24	24	7.625	7.75	1.25	0.75	-0.327508	-0.70348	286	0.00597137	0.967	0.05	73	NS

## Sheet: MW tests - highest median
Results of Mann-Whitney Tests for Two Independent Samples (two tails) - Heterokaryons growth rate assays with the highest median
For each heterokaryon, data from the assay with highest median were selected for the test. The initial level of risk a = 0,05 was adjusted for multiple testing (n=73) according to the method of Holm-Bonferroni.
Het Pair	Het1	Het2	n1	n2	Median1	Median2	IQR1	IQR2	Skewness1	Skewness2	U	r	p	a	Rank	sig
(9;32)	9(32)	32(9)	12	12	4.25	7.75	0.5	0.25	-0.349521	0.500283	0	0.851495	3.02659e-05	0.000684932	1	S
(30;32)	30(32)	32(30)	12	12	7.625	8.25	0.5625	0.3125	-0.216515	-0.286801	4.5	0.800734	8.75325e-05	0.000694444	2	S
(2;11)	11(2)	2(11)	12	12	6.125	6.75	0.5	0.5	-0.545993	-0.399614	5.5	0.790265	0.00010817	0.000704225	3	S
(9;18)	9(18)	18(9)	12	12	5.625	6.625	0.4375	0.625	-0.758893	-0.159154	6	0.78208	0.000127421	0.000714286	4	S
(11;20)	20(11)	11(20)	12	8	5.625	7.75	1.125	0.4375	0.296387	-0.410237	1.5	0.803107	0.000328647	0.000724638	5	S
(18;32)	32(18)	18(32)	12	12	7.75	6.5	0.625	0.375	-1.18007	0.657931	11.5	0.717379	0.000440704	0.000735294	6	S
(9;30)	9(30)	30(9)	12	12	7.5	7	0.3125	0.5625	-0.37312	-0.839008	14	0.690476	0.000717956	0.000746269	7	S
(24;32)	32(24)	24(32)	8	8	8.125	6.75	0.3125	0.625	0.610583	0.189941	0	0.84265	0.000750046	0.000757576	8	S
(9;20)	20(9)	9(20)	8	8	6.75	5.625	0.1875	0.5625	-0.55432	-0.330719	0.5	0.83133	0.000883166	0.000769231	9	NS
(24;30)	30(24)	24(30)	8	7	7.75	5.75	0.3125	0.625	0.935414	1.06653	0	0.842701	0.00109942	0.00078125	10	NS
(2;24)	24(2)	2(24)	12	12	6.875	6.25	0.375	0.5625	0.880763	0.0400779	17	0.651161	0.00142261	0.000793651	11	NS
(11;31)	31(11)	11(31)	12	8	7	7.75	1	0.375	0.18477	-0.301919	8.5	0.685315	0.00217799	0.000806452	12	NS
(2;19)	2(19)	19(2)	12	12	6.5	6	0.3125	0.5	0.37312	-0.481195	21.5	0.60119	0.00322725	0.000819672	13	NS
(26;31)	31(26)	26(31)	12	12	8.25	7.75	0.5625	0.75	0.122774	-1.3856	22.5	0.587335	0.00401043	0.000833333	14	NS
(18;30)	30(18)	18(30)	12	12	7	6	0.625	0.375	-0.837095	0.693628	24.5	0.568002	0.00539204	0.000847458	15	NS
(11;18)	11(18)	18(11)	8	8	7.25	7.875	0.375	0.375	0.394326	1.14987e-15	6	0.689774	0.00579614	0.000862069	16	NS
(19;30)	19(30)	30(19)	12	12	7	7.5	0.75	0	-0.199028	1.508	26	0.557732	0.00628904	0.000877193	17	NS
(24;26)	24(26)	26(24)	12	8	7.75	7.125	0.375	0.5	0.946573	0.392223	14	0.588996	0.00843675	0.000892857	18	NS
(19;31)	19(31)	31(19)	12	8	6.75	7.5	0.5	0.5625	0.719333	0.410237	14	0.588105	0.00853629	0.000909091	19	NS
(18;19)	18(19)	19(18)	12	8	5.75	6.5	0.3125	0.5625	-0.205055	-0.118322	14.5	0.580555	0.00942282	0.000925926	20	NS
(11;19)	19(11)	11(19)	12	8	6.5	7.625	0.875	0.5	-0.404061	0.274324	14.5	0.580115	0.00947692	0.000943396	21	NS
(2;18)	18(2)	2(18)	12	12	7.25	6.375	0.25	0.5625	-0.441198	0.377571	29	0.515578	0.0115434	0.000961538	22	NS
(31;32)	32(31)	31(32)	12	12	7.75	6.75	0.5	1.125	-0.217651	0.307864	28.5	0.51422	0.0117638	0.000980392	23	NS
(5;27)	5(27)	27(5)	12	12	7	7.5	0.5	0.5625	0.262261	-0.857416	31.5	0.484513	0.0176147	0.001	24	NS
(5;31)	5(31)	31(5)	12	8	7.75	8.5	0.1875	0.5625	0.0513885	0.936709	18.5	0.510461	0.0224392	0.00102041	25	NS
(20;32)	32(20)	20(32)	12	8	8.25	7.375	1	1.0625	0.0136453	0.00342471	19.5	0.492785	0.0275385	0.00104167	26	NS
(20;26)	26(20)	20(26)	12	8	6.625	7.25	1.875	0.3125	-0.397602	0.759635	20	0.485978	0.0297533	0.00106383	27	NS
(5;30)	5(30)	30(5)	12	12	7.25	7.5	0.5	0.25	-0.868461	-0.362156	37	0.415745	0.0416773	0.00108696	28	NS
(2;26)	26(2)	2(26)	12	8	6.5	7	0.25	0.125	-0.138726	-1.27294	22.5	0.443093	0.0475271	0.00111111	29	NS
(18;20)	20(18)	18(20)	12	8	7.375	6.625	0.5625	0.6875	-0.610398	0.0955168	22.5	0.441246	0.0484601	0.00113636	30	NS
(9;26)	26(9)	9(26)	12	12	7.375	7	1.25	0.6875	-0.046592	-0.857332	39	0.391126	0.0553502	0.00116279	31	NS
(5;11)	5(11)	11(5)	12	12	7.75	7.625	0.5	0.5625	0.14772	-0.775982	41	0.368394	0.0711127	0.00119048	32	NS
(27;30)	27(30)	30(27)	12	12	7	7.75	0.625	0.8125	0.255044	0.0399389	44.5	0.325866	0.110397	0.00121951	33	NS
(5;19)	5(19)	19(5)	12	12	7.5	7	0.75	1.125	0.15353	0.0163784	45.5	0.318098	0.119149	0.00125	34	NS
(9;11)	11(9)	9(11)	12	12	7.5	7	0.5	0.75	0.438657	0.277165	46.5	0.308681	0.130478	0.00128205	35	NS
(24;31)	31(24)	24(31)	8	8	7.25	7	0.375	0.75	-0.394326	-0.55432	18	0.373384	0.135297	0.00131579	36	NS
(18;26)	26(18)	18(26)	12	12	7	6.375	0.5	1.3125	1.31951	0.247107	46.5	0.302367	0.13853	0.00135135	37	NS
(11;32)	11(32)	32(11)	12	12	8.25	8	0.5625	0.5625	0.0629837	0.944755	48	0.286478	0.160483	0.00138889	38	NS
(2;30)	2(30)	30(2)	8	8	7.25	7.625	0.3125	0.5	0.386437	-0.244851	19	0.345927	0.166447	0.00142857	39	NS
(5;32)	5(32)	32(5)	12	8	8	8.125	0.25	0.625	-8.2368e-15	-0.67008	30.5	0.303621	0.174517	0.00147059	40	NS
(26;27)	27(26)	26(27)	12	12	7.75	7.375	0.3125	0.8125	-0.836142	0.314901	49	0.273688	0.179988	0.00151515	41	NS
(11;24)	24(11)	11(24)	12	8	6.625	6.375	0.8125	0.25	-0.228129	-0.823768	32	0.278232	0.213393	0.0015625	42	NS
(20;30)	30(20)	20(30)	12	12	7.625	7.25	0.875	1	-1.08784	0.122681	51	0.24819	0.224032	0.0016129	43	NS
(5;24)	5(24)	24(5)	8	8	7	6.875	0.5625	0.8125	-0.966514	-0.0513885	22.5	0.252033	0.313391	0.003125	44	NS
(18;24)	24(18)	18(24)	12	8	2.875	2.5	1.375	1	0.0228319	1.1585	33.5	0.251285	0.261106	0.00166667	45	NS
(26;30)	26(30)	30(26)	12	12	7.5	7.25	0.125	0.375	-0.545206	0.880763	53	0.226947	0.266221	0.00172414	46	NS
(20;24)	20(24)	24(20)	12	8	6.875	7	0.75	0.3125	0.177144	0.386437	34	0.242253	0.278637	0.00178571	47	NS
(2;32)	2(32)	32(2)	12	12	7.75	7.5	1	0.8125	-0.523109	-0.444665	54.5	0.20737	0.309677	0.00185185	48	NS
(5;26)	5(26)	26(5)	12	12	8.5	8.5	0.5	0.5	-0.32515	0.477594	56.5	0.191398	0.348422	0.00192308	49	NS
(11;30)	30(11)	11(30)	12	12	7.5	7.25	0.5	0.625	-0.138659	-0.582647	57	0.182797	0.37051	0.002	50	NS
(18;31)	31(18)	18(31)	12	12	7.5	7.5	0	0.625	2.1042	-0.411982	58.5	0.177782	0.383783	0.00208333	51	NS
(2;31)	31(2)	2(31)	12	12	6.5	6.875	0.3125	0.875	-0.494753	-0.133092	57	0.17755	0.384401	0.00217391	52	NS
(20;27)	20(27)	27(20)	12	12	7.375	7.25	1.8125	1.0625	-0.689999	0.328211	57.5	0.171294	0.401376	0.00227273	53	NS
(19;24)	19(24)	24(19)	12	12	6.5	6.75	1.0625	0.875	-0.929235	-0.353127	59.5	0.147829	0.468936	0.00238095	54	NS
(2;27)	27(2)	2(27)	12	8	6.25	6.375	0.5	0.3125	1.93784e-15	-0.763763	39	0.155793	0.485974	0.0025	55	NS
(9;31)	9(31)	31(9)	12	12	7.25	7.25	0.5625	0.6875	-0.85813	0.986394	60.5	0.13724	0.50137	0.00263158	56	NS
(5;20)	20(5)	5(20)	12	12	8.375	8	2.0625	0.625	-0.628486	-0.0347375	61.5	0.123932	0.543756	0.00277778	57	NS
(19;27)	27(19)	19(27)	8	8	7.5	7.375	0.75	0.5	0.165117	-0.831479	27	0.13325	0.594032	0.00294118	58	NS
(27;31)	31(27)	27(31)	12	12	7.625	7.625	0.625	0.375	0.783771	-5.26094e-16	63.5	0.100722	0.621704	0.00333333	59	NS
(20;31)	31(20)	20(31)	8	8	7.625	8	0.625	0.375	1.30979	-0.394326	28	0.106762	0.669344	0.00357143	60	NS
(9;19)	9(19)	19(9)	12	8	7	7.125	0.3125	0.3125	1.18794	0.635368	42.5	0.0952788	0.670035	0.00384615	61	NS
(30;31)	31(30)	30(31)	8	8	8	8	0.125	0.8125	-1.40659	-0.0944593	28	0.106199	0.670986	0.00416667	62	NS
(24;27)	27(24)	24(27)	8	8	7	6.875	0.5625	0.875	-0.0864699	-0.17206	28	0.105723	0.672374	0.00454545	63	NS
(26;32)	32(26)	26(32)	12	12	8.5	8.5	0.5	0.3125	-0.158098	-1.7752	65.5	0.0782538	0.70145	0.005	64	NS
(2;9)	9(2)	2(9)	12	8	6.625	6.625	0.3125	0.25	-0.51103	0	44	0.0695845	0.755655	0.00555556	65	NS
(19;20)	19(20)	20(19)	8	8	6.75	6.875	0.5625	0.3125	1.02842	1.11326	29.5	0.0702292	0.778774	0.00625	66	NS
(19;32)	19(32)	32(19)	12	8	6.875	6.875	1	0.3125	0.207146	-1.6759	45	0.0519703	0.816213	0.00714286	67	NS
(5;9)	5(9)	9(5)	12	12	7	7.5	0.5	1.125	1.03	0.0163784	68.5	0.0418528	0.837544	0.00833333	68	NS
(19;26)	19(26)	26(19)	8	8	7.625	7.5	0.5	0.5625	-0.831479	-1.02128	31	0.02649	0.915614	0.01	69	NS
(11;26)	26(11)	11(26)	12	8	7.5	7.625	0.625	0.625	-0.385118	0.270031	48	0.0173696	0.938083	0.0125	70	NS
(2;5)	5(2)	2(5)	12	8	6.75	6.875	0.5625	1.3125	0.26366	-0.157437	47	0.0172907	0.938364	0.0166667	71	NS
(27;32)	32(27)	27(32)	12	12	7.75	7.625	0.5	0.4375	-0.305196	0.40333	72	0.0118575	0.953677	0.025	72	NS
(2;20)	20(2)	2(20)	12	8	6.625	6.625	1.5625	0.3125	0.636616	0.615356	47.5	0.00870472	0.968947	0.05	73	NS

## Sheet: MW tests - 3 pairs
Results of Mann-Whitney Tests for Two Independent Samples (two tails) - Heterokaryons pairs (9;32), (18;32), (9;18) and their parents Ho9, Ho18 and Ho32
Tests were made with the data of the growth rate assay with the highest median of each isolate. The initial level of risk a = 0,05 was adjusted for multiple testing (n=36) according to the method of Holm-Bonferroni.
Isolate1	Isolate2	n1	n2	Median1	Median2	IQR1	IQR2	Skewness1	Skewness2	U	r	p	a	Rank	sig
Ho18	Ho32	12	12	2.5	8.75	0.25	0.5	-0.138659	0.210848	0	0.856763	2.70159e-05	0.00138889	1	S
18(32)	Ho18	12	12	6.5	2.5	0.375	0.25	0.657931	-0.138659	0	0.855437	2.78013e-05	0.00142857	2	S
18(32)	Ho32	12	12	6.5	8.75	0.375	0.5	0.657931	0.210848	0	0.855059	2.8029e-05	0.00147059	3	S
32(9)	Ho18	12	12	7.75	2.5	0.25	0.25	0.500283	-0.138659	0	0.85487	2.81434e-05	0.00151515	4	S
Ho9	Ho18	12	12	2.5	4.25	0.5	0.25	-0.0733855	-0.138659	0	0.854682	2.82581e-05	0.0015625	5	S
Ho9	Ho32	12	12	4.25	8.75	0.5	0.5	-0.0733855	0.210848	0	0.854305	2.84887e-05	0.0016129	6	S
18(9)	Ho18	12	12	6.625	2.5	0.625	0.25	-0.159154	-0.138659	0	0.854117	2.86046e-05	0.00166667	7	S
9(32)	Ho18	12	12	4.25	2.5	0.5	0.25	-0.349521	-0.138659	0	0.853741	2.88374e-05	0.00172414	8	S
18(9)	Ho32	12	12	6.625	8.75	0.625	0.5	-0.159154	0.210848	0	0.853741	2.88374e-05	0.00178571	9	S
9(32)	Ho32	12	12	4.25	8.75	0.5	0.5	-0.349521	0.210848	0	0.853365	2.90717e-05	0.00185185	10	S
32(18)	Ho18	12	12	7.75	2.5	0.625	0.25	-1.18007	-0.138659	0	0.853365	2.90717e-05	0.00192308	11	S
9(18)	Ho18	12	12	5.625	2.5	0.4375	0.25	-0.758893	-0.138659	0	0.853365	2.90717e-05	0.002	12	S
18(32)	Ho9	12	12	6.5	4.25	0.375	0.5	0.657931	-0.0733855	0	0.85299	2.93075e-05	0.00208333	13	S
32(18)	Ho32	12	12	7.75	8.75	0.625	0.5	-1.18007	0.210848	0	0.85299	2.93075e-05	0.00217391	14	S
9(18)	Ho32	12	12	5.625	8.75	0.4375	0.5	-0.758893	0.210848	0	0.85299	2.93075e-05	0.00227273	15	S
32(9)	Ho9	12	12	7.75	4.25	0.25	0.5	0.500283	-0.0733855	0	0.852429	2.96641e-05	0.00238095	16	S
9(32)	18(32)	12	12	4.25	6.5	0.5	0.375	-0.349521	0.657931	0	0.852055	2.99036e-05	0.0025	17	S
18(9)	Ho9	12	12	6.625	4.25	0.625	0.5	-0.159154	-0.0733855	0	0.851681	3.01447e-05	0.00263158	18	S
9(32)	32(9)	12	12	4.25	7.75	0.5	0.25	-0.349521	0.500283	0	0.851495	3.02659e-05	0.00277778	19	S
32(9)	9(18)	12	12	7.75	5.625	0.25	0.4375	0.500283	-0.758893	0	0.851122	3.05093e-05	0.00294118	20	S
32(18)	Ho9	12	12	7.75	4.25	0.625	0.5	-1.18007	-0.0733855	0	0.850936	3.06315e-05	0.003125	21	S
9(32)	18(9)	12	12	4.25	6.625	0.5	0.625	-0.349521	-0.159154	0	0.85075	3.07542e-05	0.00333333	22	S
9(32)	32(18)	12	12	4.25	7.75	0.5	0.625	-0.349521	-1.18007	0	0.850008	3.12487e-05	0.00357143	23	S
32(18)	9(18)	12	12	7.75	5.625	0.625	0.4375	-1.18007	-0.758893	0	0.849637	3.14983e-05	0.00384615	24	S
32(9)	Ho32	12	12	7.75	8.75	0.25	0.5	0.500283	0.210848	5	0.79568	9.69827e-05	0.00416667	25	S
9(18)	18(9)	12	12	5.625	6.625	0.4375	0.625	-0.758893	-0.159154	6	0.78208	0.000127421	0.00454545	26	S
9(18)	Ho9	12	12	5.625	4.25	0.4375	0.5	-0.758893	-0.0733855	6	0.780537	0.000131392	0.005	27	S
9(32)	9(18)	12	12	4.25	5.625	0.5	0.4375	-0.349521	-0.758893	6.5	0.77344	0.000151215	0.00555556	28	S
32(9)	18(32)	12	12	7.75	6.5	0.25	0.375	0.500283	0.657931	7	0.770569	0.000160008	0.00625	29	S
18(32)	9(18)	12	12	6.5	5.625	0.375	0.4375	0.657931	-0.758893	7.5	0.764978	0.000178527	0.00714286	30	S
32(9)	18(9)	12	12	7.75	6.625	0.25	0.625	0.500283	-0.159154	9.5	0.739631	0.000290715	0.00833333	31	S
18(32)	32(18)	12	12	6.5	7.75	0.375	0.625	0.657931	-1.18007	11.5	0.717379	0.000440704	0.01	32	S
32(18)	18(9)	12	12	7.75	6.625	0.625	0.625	-1.18007	-0.159154	15.5	0.667895	0.00106789	0.0125	33	S
18(32)	18(9)	12	12	6.5	6.625	0.375	0.625	0.657931	-0.159154	64	0.0951326	0.641178	0.0166667	34	NS
32(9)	32(18)	12	12	7.75	7.75	0.25	0.625	0.500283	-1.18007	64.5	0.0893055	0.661744	0.025	35	NS
9(32)	Ho9	12	12	4.25	4.25	0.5	0.5	-0.349521	-0.0733855	65	0.083612	0.682089	0.05	36	NS

## Sheet: MW tests - Acc9
Results of Mann-Whitney Tests for Two Independent Samples (two tails) - Comparison of growth rate in heterokaryon 9(32) versus all others formed with Ho9 as acceptor parent
Tests were made with the data of the growth rate assay with the highest median of each isolate. The initial level of risk a = 0,05 was adjusted for multiple testing (n=10) according to the method of Holm-Bonferroni.
Isolate1	Isolate2	n1	n2	Median 1	Median 2	IQR1	IQR2	Skewness1	Skewness2	U	r	p	a	Rank	sig
9(32)	9(30)	12	12	4.25	7.5	0.5	0.3125	-0.349521	-0.37312	0	0.853365	2.90717e-05	0.005	1	S
9(32)	9(27)	12	12	4.25	7	0.5	0.25	-0.349521	0	0	0.851868	3.0024e-05	0.00555556	2	S
9(32)	9(2)	12	12	4.25	6.625	0.5	0.3125	-0.349521	-0.51103	0	0.851122	3.05093e-05	0.00625	3	S
9(32)	9(31)	12	12	4.25	7.25	0.5	0.5625	-0.349521	-0.85813	0	0.850936	3.06315e-05	0.00714286	4	S
9(32)	9(5)	12	12	4.25	7.5	0.5	1.125	-0.349521	0.0163784	0	0.850565	3.08772e-05	0.00833333	5	S
9(32)	9(26)	12	12	4.25	7	0.5	0.6875	-0.349521	-0.857332	0	0.850565	3.08772e-05	0.01	6	S
9(32)	9(11)	12	12	4.25	7	0.5	0.75	-0.349521	0.277165	0	0.850379	3.10007e-05	0.0125	7	S
9(32)	9(19)	12	12	4.25	7	0.5	0.3125	-0.349521	1.18794	0	0.849822	3.13733e-05	0.0166667	8	S
9(32)	9(18)	12	12	4.25	5.625	0.5	0.4375	-0.349521	-0.758893	6.5	0.77344	0.000151215	0.025	9	S
9(32)	9(20)	12	8	4.25	5.625	0.5	0.5625	-0.349521	-0.330719	0	0.829327	0.000208193	0.05	10	S
